# Supplementary material
Source: publisher figshare collection journal article supplement (https://gsajournals.figshare.com/ndownloader/files/28928451)
Supplement: Supplementary file 1 [file 28928451]

## Sheet: Sheet1
Species Name	group_ID	counts
Asparagus officinalis	Hyper large	2316
Asparagus officinalis	Major extension	3090
Asparagus officinalis	Merged genes	386
Asparagus officinalis	Minor extension	3404
Asparagus officinalis	Novel	4640
Phaseolous vulgaris	Hyper large	127
Phaseolous vulgaris	Major extension	740
Phaseolous vulgaris	Merged genes	104
Phaseolous vulgaris	Minor extension	442
Phaseolous vulgaris	Novel	1172
Setaria viridis	Hyper large	293
Setaria viridis	Major extension	1228
Setaria viridis	Merged genes	330
Setaria viridis	Minor extension	305
Setaria viridis	Novel	568
Sorghum bicolor	Hyper large	8
Sorghum bicolor	Major extension	1048
Sorghum bicolor	Merged genes	162
Sorghum bicolor	Minor extension	573
Sorghum bicolor	Novel	655
Glycine max	Hyper large	121
Glycine max	Major extension	2165
Glycine max	Merged genes	428
Glycine max	Minor extension	3388
Glycine max	Novel	2529
Zea mays	Hyper large	378
Zea mays	Major extension	2279
Zea mays	Merged genes	194
Zea mays	Minor extension	1826
Zea mays	Novel	3253
